# Supplementary material for: Unstable Simple Volatiles and Gas Chromatography-Tandem Mass Spectrometry Analysis of Essential Oil from the Roots Bark of Oplopanax Horridus Extracted by Supercritical Fluid Extraction
Source: PubMed Central journal article supplement (PMC6271617; doi:10.3390/molecules191219708), 2014-11-27
Supplement: molecules-19-19708-s001.pdf [file molecules-19-19708-s001.pdf]

# Supplementary Materials

## Structure Elucidation of Isolated Volatiles

(*S,E*)-Nerolidol was obtained as light viridescent oil. The molecular formula of (*S,E*)-Nerolidol was determined to be  $C_{15}H_{26}O$  according to the electrospray ionization (ESI)-MS spectra ( $m/z$  245  $[M+Na]^+$ ) as well as  $^1H$ - and  $^{13}C$ -NMR spectrum. The IR absorptions ( $3420$ ,  $3128$  and  $1620\text{ cm}^{-1}$ ) indicated the presence of hydroxyl and  $C=C$  bond. In the  $^1H$ -NMR spectra of (*S,E*)-Nerolidol, five olefinic protons signals at  $\delta_H$  5.92 (1H, ddd,  $J = 17.4, 10.0, 5.5$  Hz), 5.22 (1H, dd,  $J = 17.5, 1.0$  Hz), 5.14 (1H, tq,  $J = 7.0, 1.0$  Hz), 5.10 (1H, m) and 5.07 (1H, dd,  $J = 10.0, 1.0$  Hz) and four methyl group at  $\delta_H$  1.68 (3H, s), 1.60 (6H, s) and 1.34 (3H, s) could be unambiguously observed. The  $^{13}C$ -NMR spectra revealed the presence of 15 carbons, including six olefinic carbons at  $\delta_C$  145.0, 135.5, 131.3, 124.9, 124.2 and 111.7, four methyl carbons ( $\delta_C$  27.8, 26.6, 17.6 and 16.0), one oxygen-bearing  $sp^3$  carbons at  $\delta_C$  73.5, and the remaining four methylene groups at  $\delta_C$  42.0, 39.7, 25.6 and 22.7. Based on the coupling constant values of the five olefinic protons, three independent vinyl groups were confirmed in the structure. On the basis of these structural determinations, GC/MS analysis and comparison the NMR spectrum data with the reported compounds, the structure of (*S,E*)-Nerolidol was identified as (*S,E*)-3,7,11-trimethyldodeca-1,6,10-trien-3-ol [1,2].

(*S,E*)-nerolidol Slight viridescent oil. ESI-MS  $m/z$ : 245  $[M+Na]^+$ .  $[\alpha]_D^{25} +153.0^\circ$  ( $c = 0.9$ ,  $CH_3OH$ ); UV  $\lambda_{max}(CH_3OH)$ : 220, 206 and 194. IR (KBr)  $\nu_{max}$ : 3420, 3128, 1620, 1115 and  $824\text{ cm}^{-1}$ .  $^1H$ -NMR ( $CDCl_3$ , 500M):  $\delta_H$  5.92 (1H, ddd,  $J = 17.4, 10.0, 5.5$  Hz, H-1b), 5.22 (1H, dd,  $J = 17.5, 1.0$  Hz, H-2), 5.14 (1H, tq,  $J = 7.0, 1.0$  Hz, H-10), 5.10 (1H, m, H-7), 5.07 (1H, dd,  $J = 10.0, 1.0$  Hz, 1a), 2.08–1.96 (6H, m, H-5, H-8, H-9), 1.68 (3H, s, H-12), 1.60 (6H, s, H-13, -14), 1.58 (2H, m, H-4), 1.35 (3H, s, H-15).  $^{13}C$ -NMR ( $CDCl_3$ , 125M):  $\delta_C$  145.0 (C-2), 135.5 (C-7), 131.3 (C-11), 124.9 (C-16), 124.2 (C-10), 111.7 (C-1), 73.5 (C-3), 42.0 (C-4), 39.7 (C-8), 27.8 (C-15), 26.6 (C-9), 25.6 (C-12), 22.7 (C-5), 17.6 (C-13), 16.0 (C-14). GC/MS (EI)  $m/z$  (%): 222 (12), 204 (41), 136 (52), 107 (100), 93 (26), 81 (16), 69 (10).

$\tau$ -cadinol was yielded as colorless oil. Its molecular formula,  $C_{15}H_{26}O$ , was calculated on the basis of its molecular ion at  $m/z$  222  $[M-H]^-$  in ESI-MS spectra together with the  $^1H$ - and  $^{13}C$ -NMR spectrum. A hydroxyl and vinyl characteristic absorptions could be noted in the IR spectra at 3510, 3120 and  $1558\text{ cm}^{-1}$ . Only one olefinic protons signal was found in the  $^1H$ -NMR spectra of  $\tau$ -cadinol at  $\delta_H$  5.54 (1H, br.d,  $J = 3.0$  Hz), as well as four methyl protons signals at  $\delta_H$  1.67 (3H, s), 1.22 (3H, s), 0.92 (3H, d,  $J = 7.5$  Hz) and 0.89 (3H, d,  $J = 7.1$  Hz) noted. Analysis of the  $^{13}C$ -NMR spectra, 15 carbons were elucidated in the molecular structure, containing two olefinic carbons at  $\delta_C$  134.3. and 126.6, four methyl carbons ( $\delta_C$  28.4, 26.6, 21.4 and 15.2), one oxygen-bearing  $sp^3$  carbons at  $\delta_C$  70.8, and the remaining eight  $sp^3$  carbons at  $\delta_C$  47.9, 46.7, 37.7, 31.0, 23.7, 22.7, 21.4 and 19.8.  $\tau$ -cadinol was applied for GC-MS analysis with these structural elucidation and comparison the NMR spectrum data with literatures, which was characterized as (1*S*,4*S*,4*aR*,8*aR*)-4-isopropyl-1,6-dimethyl-1,2,3,4,4*a*,7,8,8*a*-octahydronaphthalen-1-ol [1,3].

$\tau$ -cadinol Colorless oil. ESI-MS  $m/z$ : 221  $[M-H]^-$ .  $[\alpha]_D^{25} +62.0^\circ$  ( $c = 0.7$ ,  $CH_3OH$ ); UV  $\lambda_{max}(CH_3OH)$ : 205 and 192. IR (KBr)  $\nu_{max}$ : 3510, 3120, 1558, 1014 and  $925\text{ cm}^{-1}$ .  $^1H$ -NMR ( $CDCl_3$ , 500M):  $\delta_H$  5.54 (1H, br.d,  $J = 3.0$  Hz, H-5), 2.09–1.94 (2H, m, H-3), 1.96 (1H, m, H-6), 1.93 (1H, m, H-2a), 1.75 (1H, m, H-9a), 1.67 (3H, s, H-11), 1.46 (1H, m, H-8a), 1.41 (1H, m, H-9b), 1.35 (1H, m, H-2a), 1.22 (3H, s, H-15), 1.08 (1H, m, H-7a), 0.92 (3H, d,  $J = 7.5$  Hz, H-13), 0.80 (3H, d,  $J = 7.1$  Hz,

H-14);  $^{13}\text{C}$ -NMR ( $\text{CDCl}_3$ , 125M):  $\delta_{\text{C}}$  134.3 (C-4), 126.6 (C-5), 70.8 (C-10), 47.9 (C-1), 46.7 (C-7), 40.4 (C-9), 37.7 (C-6), 31.0 (C-3), 28.4 (C-15), 26.6 (C-12), 23.7 (C-11), 22.7 (C-2), 21.4 (C-13), 19.8 (C-8), 15.2 (C-15). GC/MS (EI)  $m/z$  (%): 222 (21), 204 (45), 148 (42), 105 (100), 91 (34), 79 (22), 63 (16).

*S*-Falcarinol was purified as light yellowish oil. The ESI-MS of *S*-Falcarinol displayed a molecular ion at  $m/z$  267  $[\text{M}+\text{Na}]^+$ , which suggested the molecular formula of *S*-Falcarinol was determined to be  $\text{C}_{17}\text{H}_{24}\text{O}$  from a combination of  $^1\text{H}$ - and  $^{13}\text{C}$ -NMR spectrum data. The UV (285, 268, 260 and 250 nm) and IR absorptions (2252 and  $1682\text{ cm}^{-1}$ ) implied the existence of two  $\text{C}\equiv\text{C}$  bonds [4]. Analysis of the  $^1\text{H}$ -NMR spectra of *S*-Falcarinol, five olefinic protons signals at  $\delta_{\text{H}}$  5.93 (ddd,  $J = 17.4, 10.0, 5.5$  Hz), 5.64 (ddt,  $J = 10.6, 7.5, 1.0$  Hz), 5.51 (ddt,  $J = 10.6, 8.2, 1.0$  Hz), 5.48 (dt,  $J = 17.4, 1.0$  Hz) and 5.25 (dt,  $J = 10.0, 1.0$  Hz), an oxygen-bearing  $sp^3$  carbon proton at  $\delta_{\text{H}}$  4.95 (1H, d,  $J = 6.0$  Hz), seven methylene groups at  $\delta_{\text{H}}$  2.43 (2H, d,  $J = 6.7$  Hz), 2.10 (2H, tq,  $J = 7.1, 1.5$  Hz), 1.38 (2H, m) and 1.28 (8H, m) and one methyl group at  $\delta_{\text{H}}$  0.89 (3H, t,  $J = 7.2$  Hz) could be observed.

The  $^{13}\text{C}$ -NMR spectra provided 17 carbon rods signals, including four olefinic carbons at  $\delta_{\text{C}}$  135.3, 132.4, 124.6 and 117.2, seven methylenes carbons ( $\delta_{\text{C}}$  31.7, 29.2, 29.1, 29.1, 27.6, 22.6 and 18.3), one methyl ( $\delta_{\text{C}}$  9.4), four unprotonated acetylenic carbons and one oxygen-bearing  $sp^3$  carbons at  $\delta_{\text{C}}$  63.6. The vicinal coupling constant between H-9 and H-10 ( $J_{9,10} = 10.7$  Hz) decided that the geometry of the double bond between C-9 and C-10 to be *cis* as the double bond fixed to be **Z**. From the above analysis and comparison the NMR data with known compound, the structure of (*S*)-falcarindiol was elucidated as (*S,Z*)-heptadeca-1,9-dien-4,6-diyne-3-ol [5].

(*S*)-falcarindiol yellowish oil;  $[\alpha]_{\text{D}}^{25} +173.5^\circ$  ( $c = 0.67$ ,  $\text{CHCl}_3$ ); UV ( $\text{CHCl}_3$ )  $\lambda_{\text{max}}$  (log  $\xi$ ): 220 (0.78), 250 (0.92), 260 (1.59), 268 (1.78) and 285 (2.13) nm; IR (KBr)  $\nu_{\text{max}}$ : 3352, 3018, 2935, 2852, 2252, 1682, 1468, 1022, 936 and  $876\text{ cm}^{-1}$ ;  $^1\text{H}$ -NMR(500 MHz,  $\text{CDCl}_3$ ):  $\delta_{\text{H}}$  5.93 (1H, ddd,  $J = 17.5, 10.0, 6.0$  Hz, H-2), 5.64 (1H, dd,  $J = 17.5, 1.5$  Hz, H-1b), 5.51 (1H, ddt,  $J = 11.5, 5.0, 1.5$  Hz, H-9), 5.48 (1H, ddt,  $J = 11.5, 7.5, 1.0$  Hz, H-10), 5.25 (1H, d,  $J = 10.0$  Hz, H-1a), 4.95 (1H, brd,  $J = 5.0$  Hz, H-3), 2.43 (1H, d,  $J = 6.7$  Hz, H-8), 2.10 (2H, q,  $J = 7.0$ , H-11), 1.38 (2H, m, H-12), 1.28 (8H, m, H-13, H-14, H-15, H-16), 0.89 (3H, t,  $J = 7.0$  Hz, H-17).  $^{13}\text{C}$ -NMR (125 MHz,  $\text{CDCl}_3$ ):  $\delta_{\text{C}}$  9.4 (C-17), 18.3 (C-8), 22.6 (C-15), 27.6 (C-11), 29.0 (C-12), 29.1 (C-14), 29.2(C-13), 31.7 (C-16), 63.6 (C-3), 68.8 (C-6), 70.7 (C-5), 78.5 (C-4), 77.8 (C-7), 117.2 (C-1), 124.6 (C-10), 132.4 (C-9), 135.3 (C-2). GC/MS (EI)  $m/z$  (%): 244 (18), 202 (100), 118 (46), 105 (45), 79 (21).

## References

1. Sun, S.; Du, G.J.; Qi, L.W.; Williams, S.; Wang, C.Z.; Yuan, C.S. Hydrophobic constituents and their potential anticancer activities from Devil's club (*Oplopanax horridus* Miq.). *J. Ethnopharmacol.* **2010**, *132*, 280–285.
2. Dittmer, D.C.; Discordia, R.P.; Zhang, Y.Z.; Murphy, C.K.; Kumar, A.; Pepito, A.S.; Wang, Y.S. A tellurium transposition route to allylic alcohols-overcoming some limitations of the sharpless katsuki asymmetric epoxidation. *J. Org. Chem.* **1993**, *58*, 718–731.
3. Appendino, G.; Jakupovic, J.I.; Jakupovic, S. Sesquiterpenoids from *Pallenis spinosa*. *Phytochemistry* **1997**, *46*, 1039–1043.

4. Crosby, D.G.; Aharonson, N. The structure of carotatoxin, a natural toxicant from carrot. *Tetrahedron* **1967**, *23*, 465–472.
5. Li, Z.Y.; Wang, M.; Bian, Q.H.; Zheng, B.; Mao, J.Y.; Li, S.N.; Liu, S.Z.; Wang, M.A.; Zhong, J.C.; Guo, H.C. Highly enantioselective addition of trimethylsilylacetylene to aldehydes catalyzed by a zinc-amino-alcohol complex. *Chem. Eur. J.* **2011**, *17*, 5782–5786.
